# Supplementary material for: Influence of central sidechain on self-assembly of glycine-x-glycine peptides
Source: Royal Society of Chemistry journal article supplement (doi:10.1039/d2sm01082h), 2022-11-18
Supplement: d2sm01082h1.pdf [file d2sm01082h1.pdf]

***Supporting Information for:***

**Influence of Central Sidechain on Self-Assembly of  
Glycine-X-Glycine Peptides**

*Lavenia J. Thursch<sup>1</sup>, Thamires A. Lima<sup>1</sup>, Nichole O'Neill<sup>1,3</sup>, Fabio  
Furlan Ferreira<sup>2</sup>, Reinhard Schweitzer-Stenner<sup>3\*</sup>, and Nicolas J.  
Alvarez<sup>1\*</sup>*

<sup>1</sup>Department of Chemical and Biological Engineering, Drexel University, Philadelphia, PA 19104, USA, <sup>2</sup>Centro de Ciências Naturais e Humanas, Universidade Federal do ABC, Santo André, São Paulo, Brazil and <sup>3</sup> Department of Chemistry, Drexel University, Philadelphia, PA 19104, USA

## Figures

Figure S1. Representative decompositions of the first and last spectra measured at the beginning and end of the kinetic experiments for GFG at pH 3.4, respectively. The band position monitored was  $1633\text{ cm}^{-1}$ . The fractional intensities of the band with respect to the amide I' region were plotted as a function of time. The resultant plot was fitted with an exponential and is presented in Table 2.

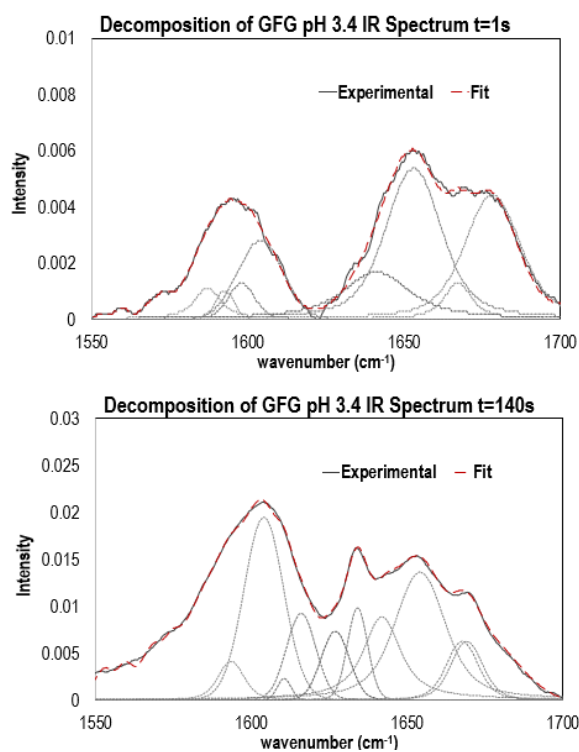

Figure S2. XRD raw data (black dots), Rietveld refinement (red line), the difference between raw and calculated data (blue line), and Bragg reflections (vertical magenta lines) of a) GDG, b) GHG, c) GFG, d) GYG and e) GAG pure peptides.

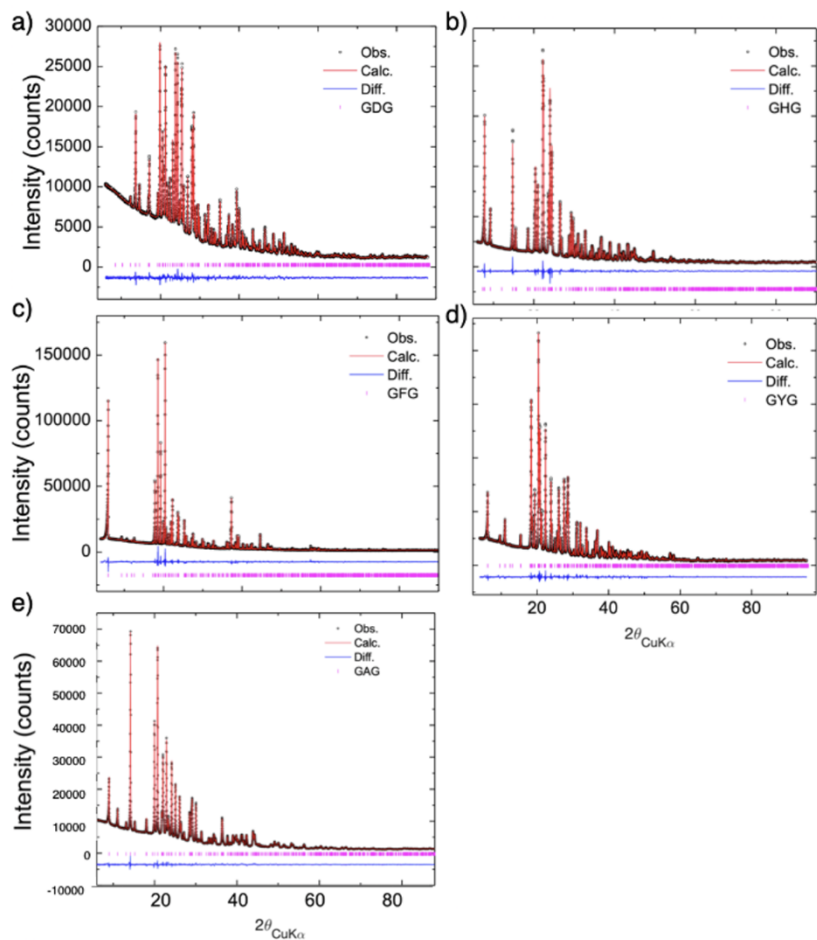

Figure S3: Direct comparison between the raw diffractograms of powder and almost dried gels for each peptide, a) GAG, b) GDG, c) GFG, d) GHG, e) GWG and f) GYG.

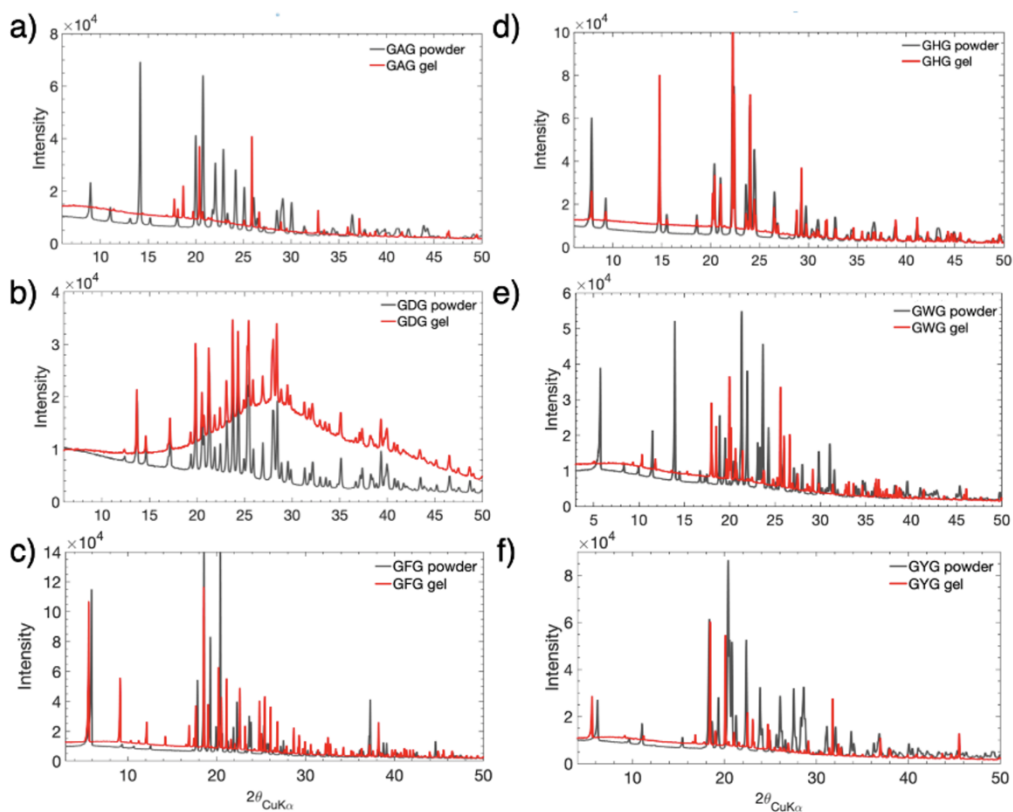

Table S1. GAG Fractional Atom Coordinates.

| Atom | x         | y         | z          |
|------|-----------|-----------|------------|
| C1   | 0.5597(7) | 0.4801(5) | 0.4218(14) |
| N2   | 0.5773(4) | 0.4194(3) | 0.2458(12) |
| C3   | 0.5438(5) | 0.5671(4) | 0.3011(15) |
| O4   | 0.5577(4) | 0.4687(3) | 0.6778(8)  |
| C5   | 0.5950(5) | 0.3347(4) | 0.3419(14) |
| N6   | 0.4552(5) | 0.6113(3) | 0.4325(10) |

|     |           |           |            |
|-----|-----------|-----------|------------|
| C7  | 0.6483(4) | 0.6184(4) | 0.3232(12) |
| C8  | 0.5058(6) | 0.2982(5) | 0.5207(17) |
| C9  | 0.3558(6) | 0.5971(5) | 0.3676(15) |
| O10 | 0.5293(4) | 0.2448(3) | 0.6931(11) |
| O11 | 0.4139(4) | 0.3193(3) | 0.4637(10) |
| O12 | 0.3274(3) | 0.5460(4) | 0.1921(8)  |
| C13 | 0.2751(4) | 0.6434(5) | 0.5479(14) |
| N14 | 0.1659(3) | 0.6180(3) | 0.4747(9)  |
| H1  | 0.2806(4) | 0.7017(5) | 0.5019(14) |
| H2  | 0.2905(4) | 0.6356(5) | 0.7443(14) |
| H3  | 0.7031(4) | 0.5912(4) | 0.2148(12) |
| H4  | 0.6341(4) | 0.6725(4) | 0.2444(12) |
| H5  | 0.6722(4) | 0.6246(4) | 0.5144(12) |
| H6  | 0.1603(3) | 0.5653(3) | 0.5168(9)  |
| H7  | 0.1211(3) | 0.6467(3) | 0.5763(9)  |
| H8  | 0.5773(4) | 0.4293(3) | 0.0656(12) |
| H10 | 0.6592(5) | 0.3346(4) | 0.4538(14) |
| H11 | 0.6051(5) | 0.2995(4) | 0.1802(14) |

|     |           |           |            |
|-----|-----------|-----------|------------|
| H12 | 0.5247(5) | 0.5597(4) | 0.1068(15) |
| H13 | 0.4695(5) | 0.6483(3) | 0.5619(10) |
| H14 | 0.1513(3) | 0.6252(3) | 0.2971(9)  |

Table S2. GAG bond lengths.

| Atom 1 | Atom 2 | Bond Length (Å) |
|--------|--------|-----------------|
| C1     | N2     | 1.300(10)       |
| C3     | C1     | 1.519(11)       |
| O4     | C1     | 1.229(8)        |
| C5     | N2     | 1.447(9)        |
| C3     | N6     | 1.453(9)        |
| C7     | C3     | 1.545(8)        |
| C5     | C8     | 1.517(10)       |
| C9     | N6     | 1.298(10)       |
| O10    | C8     | 1.219(9)        |
| O11    | C8     | 1.226(9)        |
| O12    | C9     | 1.220(9)        |
| C13    | C9     | 1.515(10)       |

|     |     |          |
|-----|-----|----------|
| C13 | N14 | 1.464(7) |
|-----|-----|----------|

Table S3. GAG bond angles.

| Atom 1 | Atom 2 | Atom 3 | Bond Angle (°) |
|--------|--------|--------|----------------|
| C3     | C1     | N2     | 117.713(59)    |
| O4     | C1     | N2     | 121.851(72)    |
| O4     | C1     | C3     | 120.424(69)    |
| C5     | N2     | C1     | 121.562(60)    |
| C1     | C3     | N6     | 112.577(56)    |
| C7     | C3     | C1     | 110.569(53)    |
| C7     | C3     | N6     | 110.776(54)    |
| C8     | C5     | N2     | 115.146(51)    |
| C3     | N6     | C9     | 122.697(56)    |
| O10    | C8     | C5     | 117.955(63)    |
| O11    | C8     | C5     | 117.216(64)    |
| O11    | C8     | O10    | 124.497(69)    |
| O12    | C9     | N6     | 123.846(69)    |
| C13    | C9     | N6     | 114.568(58)    |

|     |     |     |             |
|-----|-----|-----|-------------|
| O12 | C9  | C13 | 121.343(66) |
| C9  | C13 | N14 | 110.437(60) |

Table S4. GAG Torsion Angle Data

| Atom 1 | Atom 2 | Atom 3 | Atom 4 | Torsion Angle<br>(°) |
|--------|--------|--------|--------|----------------------|
| C3     | C1     | N2     | C5     | 179.038              |
| O4     | C1     | N2     | C5     | 0.335                |
| N6     | C3     | C1     | N2     | 136.15               |
| C7     | C3     | C1     | N2     | -99.355              |
| O4     | C1     | C3     | N6     | -45.127              |
| O4     | C1     | C3     | C7     | 79.368               |
| C8     | C5     | N2     | C1     | 57.182               |
| C1     | C3     | N6     | C9     | -78.604              |
| C7     | C3     | N6     | C9     | 157.015              |
| O10    | C8     | C5     | N2     | -151.969             |
| O11    | C8     | C5     | N2     | 34.34                |
| O12    | C9     | N6     | C3     | -0.072               |



|     |    |     |     |          |
|-----|----|-----|-----|----------|
| C13 | C9 | N6  | C3  | 174.309  |
| N6  | C9 | C13 | N14 | -175.215 |
| O12 | C9 | C13 | N14 | -0.679   |

Table S5. Hydrogen-bonding Interaction Analysis for GAG.

| Donor   | Acceptor | D-H (Å) | H...A (Å) | D...A (Å) | D-H...A (°) | Type           |
|---------|----------|---------|-----------|-----------|-------------|----------------|
| N2-H8   | O4       | 0.87    | 1.961     | 2.819     | 169.0       | intermolecular |
| N6-H13  | O10      | 0.87    | 1.933     | 2.785     | 165.5       | intermolecular |
| N14-H6  | O12      | 0.87    | 1.972     | 2.821     | 165.2       | intermolecular |
| N14-H7  | O11      | 0.87    | 1.966     | 2.717     | 143.8       | intermolecular |
| N14-H14 | O11      | 0.87    | 1.989     | 2.807     | 156.3       | intermolecular |

Table S6. GDG Fractional Atom Coordinates.

| <b>Atom</b> | <b>x</b>  | <b>y</b>   | <b>z</b>    |
|-------------|-----------|------------|-------------|
| C1          | 0.3676(5) | 0.2532(5)  | 0.0594(18)  |
| C2          | 0.2995(4) | 0.3070(6)  | -0.083(2)   |
| C3          | 0.4376(4) | 0.3295(5)  | 0.0831(15)  |
| N4          | 0.3910(4) | 0.1624(4)  | -0.1012(11) |
| N5          | 0.2520(4) | 0.3579(5)  | 0.0796(17)  |
| O6          | 0.2959(3) | 0.3148(4)  | -0.3411(10) |
| C7          | 0.5070(4) | 0.2864(6)  | 0.2372(17)  |
| C8          | 0.3560(5) | 0.0735(6)  | -0.0739(17) |
| C9          | 0.1873(4) | 0.4174(6)  | -0.0292(19) |
| O10         | 0.4919(3) | 0.2150(3)  | 0.4221(9)   |
| O11         | 0.5735(3) | 0.3169(3)  | 0.1991(10)  |
| C12         | 0.3874(4) | -0.0116(5) | -0.2632(15) |
| O13         | 0.3075(3) | 0.0552(3)  | 0.1078(12)  |
| C14         | 0.1136(5) | 0.4054(6)  | 0.145(2)    |
| N15         | 0.3469(3) | -0.1092(3) | -0.2068(11) |
| O16         | 0.1135(3) | 0.3401(4)  | 0.3313(11)  |
| O17         | 0.0582(3) | 0.4620(3)  | 0.0961(9)   |

|     |           |            |             |
|-----|-----------|------------|-------------|
| H1  | 0.3525(5) | 0.2326(5)  | 0.2402(18)  |
| H2  | 0.1760(4) | 0.3960(6)  | -0.2143(19) |
| H3  | 0.2009(4) | 0.4899(6)  | -0.0254(19) |
| H4  | 0.4291(4) | 0.1701(4)  | -0.2291(11) |
| H5  | 0.5364(3) | 0.1856(3)  | 0.5335(9)   |
| H6  | 0.2601(4) | 0.3566(5)  | 0.2616(17)  |
| H7  | 0.2969(3) | -0.1000(3) | -0.2391(11) |
| H8  | 0.3643(3) | -0.1579(3) | -0.3134(11) |
| H9  | 0.4428(4) | -0.0232(5) | -0.2245(15) |
| H10 | 0.3813(4) | 0.0063(5)  | -0.4552(15) |
| H11 | 0.4195(4) | 0.3918(5)  | 0.1791(15)  |
| H12 | 0.4539(4) | 0.3501(5)  | -0.1048(15) |
| H13 | 0.3526(3) | -0.1267(3) | -0.0300(11) |

Table S7. GDG Bond length data

| Atom 1 | Atom 2 | Bond Length (Å) |
|--------|--------|-----------------|
| C1     | C2     | 1.517           |
| C3     | C1     | 1.556           |

|     |     |       |
|-----|-----|-------|
| C1  | N4  | 1.455 |
| C2  | N5  | 1.301 |
| O6  | C2  | 1.233 |
| C3  | C7  | 1.503 |
| C8  | N4  | 1.301 |
| C9  | N5  | 1.444 |
| O10 | C7  | 1.3   |
| O11 | C7  | 1.219 |
| C12 | C8  | 1.519 |
| O13 | C8  | 1.222 |
| C9  | C14 | 1.518 |
| C12 | N15 | 1.463 |
| O16 | C14 | 1.223 |
| O17 | C14 | 1.22  |

Table S8. GDG bond angles.

| Atom 1 | Atom 2 | Atom 3 | Bond Angle (°) |
|--------|--------|--------|----------------|
| C3     | C1     | C2     | 109.573        |

|     |     |     |         |
|-----|-----|-----|---------|
| C2  | C1  | N4  | 110.249 |
| C3  | C1  | N4  | 109.617 |
| C1  | C2  | N5  | 116.532 |
| O6  | C2  | C1  | 121.347 |
| O6  | C2  | N5  | 121.289 |
| C1  | C3  | C7  | 114.228 |
| C1  | N4  | C8  | 122.078 |
| C9  | N5  | C2  | 122.382 |
| O10 | C7  | C3  | 115.785 |
| O11 | C7  | C3  | 123.157 |
| O10 | C7  | O11 | 121.039 |
| C12 | C8  | N4  | 114.559 |
| O13 | C8  | N4  | 123.664 |
| O13 | C8  | C12 | 121.347 |
| C14 | C9  | N5  | 112.844 |
| C8  | C12 | N15 | 110.262 |
| O16 | C14 | C9  | 117.84  |
| O17 | C14 | C9  | 118.792 |

|     |     |     |         |
|-----|-----|-----|---------|
| O16 | C14 | O17 | 123.357 |
|-----|-----|-----|---------|

Table S9. GDG Torsion Angle Data

| <b>Atom 1</b> | <b>Atom 2</b> | <b>Atom 3</b> | <b>Atom 4</b> | <b>Torsion Angle<br/>(°)</b> |
|---------------|---------------|---------------|---------------|------------------------------|
| C3            | C1            | C2            | N5            | -87.923                      |
| O6            | C2            | C1            | C3            | 81.761                       |
| N4            | C1            | C2            | N5            | 151.349                      |
| O6            | C2            | C1            | N4            | -38.967                      |
| C2            | C1            | C3            | C7            | 176.47                       |
| C7            | C3            | C1            | N4            | -62.419                      |
| C2            | C1            | N4            | C8            | -83.521                      |
| C3            | C1            | N4            | C8            | 155.777                      |
| C1            | C2            | N5            | C9            | 176.487                      |
| O6            | C2            | N5            | C9            | 6.796                        |
| O10           | C7            | C3            | C1            | -26.987                      |
| O11           | C7            | C3            | C1            | 154.592                      |

|     |     |     |     |         |
|-----|-----|-----|-----|---------|
| C12 | C8  | N4  | C1  | 178.77  |
| O13 | C8  | N4  | C1  | -8.671  |
| C14 | C9  | N5  | C2  | 138.767 |
| N4  | C8  | C12 | N15 | 177.245 |
| O13 | C8  | C12 | N15 | 4.496   |
| O16 | C14 | C9  | N5  | -8.272  |
| O17 | C14 | C9  | N5  | 170.542 |

Table S10. Hydrogen-bonding Interaction Analysis for GDG.

| Donor  | Acceptor | D-H (Å) | H...A (Å) | D...A (Å) | D-H...A (°) | Type           |
|--------|----------|---------|-----------|-----------|-------------|----------------|
| N4-H4  | O10      | 0.90    | 2.060     | 2.930     | 163.0       | intermolecular |
| N5-H6  | O6       | 0.88    | 2.058     | 2.909     | 163.4       | intermolecular |
| O10-H5 | O16      | 1.00    | 1.506     | 2.494     | 167.3       | intermolecular |
| O10-H5 | O17      | 1.00    | 2.621     | 3.429     | 137.6       | intermolecular |

|         |     |      |       |       |       |                    |
|---------|-----|------|-------|-------|-------|--------------------|
|         |     |      |       |       |       | cular              |
| N15-H7  | O13 | 0.88 | 2.015 | 2.873 | 165.3 | intermole<br>cular |
| N15-H8  | O16 | 0.86 | 2.480 | 3.062 | 125.6 | intermole<br>cular |
| N15-H8  | O11 | 0.86 | 2.146 | 2.872 | 141.8 | intermole<br>cular |
| N15-H13 | O11 | 0.88 | 2.147 | 2.932 | 148.9 | intermole<br>cular |

Table S11. GHG Fractional Atom Coordinates.

| Atom | x           | y           | z           |
|------|-------------|-------------|-------------|
| O1   | 0.0646(5)   | -0.0117(10) | 0.0405(4)   |
| H2   | 0.1483(5)   | -0.0078(10) | 0.0451(4)   |
| H3   | 0.0244(5)   | 0.1641(10)  | 0.0061(4)   |
| C4   | 0.55980(12) | 0.8830(3)   | 0.32354(13) |
| C5   | 0.66282(13) | 0.7303(4)   | 0.29138(12) |
| O6   | 0.5543(2)   | 1.1437(4)   | 0.3300(3)   |



|     |             |             |              |
|-----|-------------|-------------|--------------|
| N7  | 0.48300(12) | 0.7138(3)   | 0.35354(13)  |
| N8  | 0.69293(18) | 0.8851(5)   | 0.19962(13)  |
| C9  | 0.77145(14) | 0.6818(2)   | 0.39277(6)   |
| C10 | 0.37850(12) | 0.8227(3)   | 0.38104(13)  |
| C11 | 0.64634(18) | 0.8255(3)   | 0.09183(11)  |
| C12 | 0.87510(11) | 0.57519(14) | 0.35647(4)   |
| C13 | 0.30570(12) | 1.0146(3)   | 0.29044(13)  |
| O14 | 0.5898(3)   | 0.6075(5)   | 0.0609(2)    |
| C15 | 0.7003(2)   | 1.0046(7)   | 0.01463(14)  |
| N16 | 0.86339(13) | 0.32190(15) | 0.29197(5)   |
| C17 | 0.98457(13) | 0.6701(2)   | 0.37121(6)   |
| O18 | 0.30111(12) | 0.9349(3)   | 0.19313(13)  |
| O19 | 0.2545(3)   | 1.2192(5)   | 0.3159(2)    |
| N20 | 0.6326(4)   | 0.9728(10)  | -0.10336(18) |
| C21 | 0.96775(14) | 0.2711(2)   | 0.26968(6)   |
| N22 | 1.04376(14) | 0.4829(2)   | 0.31769(6)   |
| H23 | 0.5586(4)   | 0.9865(10)  | -0.11774(18) |
| H24 | 0.6732(4)   | 1.0181(10)  | -0.14944(18) |

|     |             |            |              |
|-----|-------------|------------|--------------|
| H25 | 0.73599(18) | 1.0268(5)  | 0.21380(13)  |
| H26 | 0.7819(2)   | 0.9443(7)  | 0.02142(14)  |
| H27 | 0.6977(2)   | 1.1909(7)  | 0.02912(14)  |
| H28 | 0.63341(13) | 0.5387(4)  | 0.26545(12)  |
| H29 | 0.49180(12) | 0.5319(3)  | 0.34734(13)  |
| H30 | 0.40250(12) | 0.9289(3)  | 0.44914(13)  |
| H31 | 0.33010(12) | 0.6658(3)  | 0.39134(13)  |
| H32 | 1.01332(13) | 0.8500(2)  | 0.40427(6)   |
| H33 | 0.6357(4)   | 0.7791(10) | -0.11244(18) |
| H34 | 1.11920(14) | 0.5127(2)  | 0.31312(6)   |
| H35 | 0.75480(14) | 0.5655(2)  | 0.44575(6)   |
| H36 | 0.79610(14) | 0.8713(2)  | 0.42365(6)   |
| H37 | 0.99235(14) | 0.1159(2)  | 0.23232(6)   |

Table S12. GHG Bond length data.

| Atom 1 | Atom 2 | Bond Length (Å) |
|--------|--------|-----------------|
| C5     | C4     | 1.543           |
| O6     | C4     | 1.234           |

|     |     |       |
|-----|-----|-------|
| C4  | N7  | 1.325 |
| C5  | N8  | 1.47  |
| C9  | C5  | 1.558 |
| C10 | N7  | 1.446 |
| C11 | N8  | 1.338 |
| C9  | C12 | 1.487 |
| C10 | C13 | 1.521 |
| O14 | C11 | 1.229 |
| C15 | C11 | 1.53  |
| C12 | N16 | 1.424 |
| C17 | C12 | 1.325 |
| O18 | C13 | 1.253 |
| O19 | C13 | 1.219 |
| C15 | N20 | 1.482 |
| C21 | N16 | 1.342 |
| C17 | N22 | 1.392 |
| C21 | N22 | 1.367 |

Table S13. GHG Bond angle data.

| <b>Atom 1</b> | <b>Atom 2</b> | <b>Atom 3</b> | <b>Bond Angle (°)</b> |
|---------------|---------------|---------------|-----------------------|
| O6            | C4            | C5            | 122.586               |
| C5            | C4            | N7            | 115.121               |
| O6            | C4            | N7            | 122.026               |
| C4            | C5            | N8            | 109.194               |
| C9            | C5            | C4            | 112.903               |
| C9            | C5            | N8            | 112.932               |
| C10           | N7            | C4            | 121.969               |
| C5            | N8            | C11           | 123.59                |
| C5            | C9            | C12           | 111.397               |
| C13           | C10           | N7            | 112.531               |
| O14           | C11           | N8            | 122.396               |
| C15           | C11           | N8            | 112.501               |
| O14           | C11           | C15           | 122.794               |
| C9            | C12           | N16           | 119.073               |
| C9            | C12           | C17           | 132.867               |
| C17           | C12           | N16           | 108.059               |
| O18           | C13           | C10           | 114.266               |

|     |     |     |         |
|-----|-----|-----|---------|
| O19 | C13 | C10 | 119.845 |
| O18 | C13 | O19 | 125.826 |
| C11 | C15 | N20 | 111.163 |
| C21 | N16 | C12 | 107.739 |
| C12 | C17 | N22 | 107.648 |
| N22 | C21 | N16 | 107.742 |
| C17 | N22 | C21 | 108.811 |

Table S14. GHG Torsion angle data.

| <b>Atom 1</b> | <b>Atom 2</b> | <b>Atom 3</b> | <b>Atom 4</b> | <b>Torsion Angle<br/>(°)</b> |
|---------------|---------------|---------------|---------------|------------------------------|
| O6            | C4            | C5            | N8            | -41.73                       |
| O6            | C4            | C5            | C9            | 84.779                       |
| N8            | C5            | C4            | N7            | 144.092                      |
| C9            | C5            | C4            | N7            | -89.398                      |
| C5            | C4            | N7            | C10           | -177.029                     |
| O6            | C4            | N7            | C10           | 8.757                        |
| C4            | C5            | N8            | C11           | -92.222                      |

|     |     |     |     |          |
|-----|-----|-----|-----|----------|
| C9  | C5  | N8  | C11 | 141.286  |
| C4  | C5  | C9  | C12 | -171.295 |
| C12 | C9  | C5  | N8  | -46.804  |
| C13 | C10 | N7  | C4  | 52.51    |
| O14 | C11 | N8  | C5  | -12.464  |
| C15 | C11 | N8  | C5  | -175.63  |
| C5  | C9  | C12 | N16 | -56.552  |
| C17 | C12 | C9  | C5  | 123.117  |
| O18 | C13 | C10 | N7  | 38.076   |
| O19 | C13 | C10 | N7  | -144.641 |
| N8  | C11 | C15 | N20 | -169.589 |
| O14 | C11 | C15 | N20 | 27.323   |

Table S15. Hydrogen-bonding Interaction Analysis for GHG.

| Donor | Acceptor | D-H (Å) | H...A (Å) | D...A (Å) | D-H...A<br>(°) | Type               |
|-------|----------|---------|-----------|-----------|----------------|--------------------|
| O1-H2 | O18      | 0.97    | 2.225     | 2.935     | 129.3          | intermole<br>cular |

|         |     |      |       |       |       |                    |
|---------|-----|------|-------|-------|-------|--------------------|
| O1-H3   | O1  | 0.99 | 1.856 | 2.840 | 170.6 | intermole<br>cular |
| N7-H29  | O6  | 0.87 | 2.002 | 2.850 | 164.9 | intermole<br>cular |
| N8-H25  | N16 | 0.83 | 2.086 | 2.890 | 163.7 | intermole<br>cular |
| N20-H23 | O14 | 0.84 | 2.115 | 2.858 | 147.1 | intermole<br>cular |
| N20-H24 | O18 | 0.86 | 2.080 | 2.652 | 123.4 | intermole<br>cular |
| N20-H33 | O18 | 0.92 | 2.136 | 2.952 | 147.0 | intermole<br>cular |
| N22-H34 | O19 | 0.91 | 2.096 | 2.768 | 129.7 | intermole<br>cular |

Table S16. GYG Fractional Atom Coordinates.

| <b>Atom</b> | <b>x</b>  | <b>y</b>    | <b>z</b>   |
|-------------|-----------|-------------|------------|
| C1          | 0.5705(2) | 0.23894(10) | 0.39168(4) |

|     |             |              |             |
|-----|-------------|--------------|-------------|
| C2  | 0.47013(17) | 0.09544(9)   | 0.38896(7)  |
| N3  | 0.4555(2)   | 0.30450(14)  | 0.43328(4)  |
| C4  | 0.4890(3)   | 0.32321(13)  | 0.34722(4)  |
| O5  | 0.2281(3)   | 0.07057(19)  | 0.39585(11) |
| N6  | 0.6460(2)   | -0.00397(11) | 0.38068(7)  |
| C7  | 0.59860(17) | 0.38526(14)  | 0.46075(4)  |
| C8  | 0.6246(2)   | 0.27012(11)  | 0.30434(3)  |
| C9  | 0.5639(4)   | -0.13818(11) | 0.36783(4)  |
| O10 | 0.8477(3)   | 0.3900(2)    | 0.46015(7)  |
| C11 | 0.4373(3)   | 0.46271(13)  | 0.49791(6)  |
| C12 | 0.8401(3)   | 0.34499(14)  | 0.28356(4)  |
| C13 | 0.5074(3)   | 0.16048(14)  | 0.27870(4)  |
| C14 | 0.5155(3)   | -0.23720(10) | 0.40886(3)  |
| N15 | 0.5818(5)   | 0.58781(15)  | 0.51293(10) |
| C16 | 0.9461(3)   | 0.30697(13)  | 0.23980(4)  |
| C17 | 0.6090(3)   | 0.12434(15)  | 0.23428(4)  |
| O18 | 0.4031(6)   | -0.34882(15) | 0.40198(6)  |
| O19 | 0.6139(6)   | -0.20419(19) | 0.44682(5)  |



|     |           |              |             |
|-----|-----------|--------------|-------------|
| C20 | 0.8432(2) | 0.19051(12)  | 0.21662(3)  |
| O21 | 0.9401(5) | 0.1610(2)    | 0.17286(5)  |
| H1  | 0.7635(2) | 0.23996(10)  | 0.39591(4)  |
| H2  | 0.8147(2) | 0.01529(11)  | 0.38069(7)  |
| H3  | 1.0934(3) | 0.35683(13)  | 0.22631(4)  |
| H4  | 0.6073(5) | 0.64360(15)  | 0.48869(10) |
| H5  | 0.4827(5) | 0.63650(15)  | 0.53349(10) |
| H6  | 0.7351(5) | 0.56840(15)  | 0.52529(10) |
| H7  | 0.4015(3) | 0.40795(13)  | 0.52561(6)  |
| H8  | 0.2606(3) | 0.49085(13)  | 0.48511(6)  |
| H9  | 0.2831(2) | 0.29227(14)  | 0.43925(4)  |
| H10 | 0.9176(3) | 0.42376(14)  | 0.29990(4)  |
| H11 | 0.5024(3) | 0.06161(15)  | 0.21547(4)  |
| H12 | 0.3832(3) | 0.09861(14)  | 0.29522(4)  |
| H13 | 0.8237(5) | 0.1619(2)    | 0.14441(5)  |
| H14 | 0.5356(3) | 0.41984(13)  | 0.35291(4)  |
| H15 | 0.2914(3) | 0.31814(13)  | 0.34441(4)  |
| H16 | 0.6818(4) | -0.17501(11) | 0.34628(4)  |

|     |           |              |            |
|-----|-----------|--------------|------------|
| H17 | 0.3778(4) | -0.12821(11) | 0.35268(4) |
|-----|-----------|--------------|------------|

Tables S17. GYG Bond length data.

| Atom 1 | Atom 2 | Bond Length (Å) |
|--------|--------|-----------------|
| C1     | C2     | 1.475           |
| C1     | N3     | 1.459           |
| C4     | C1     | 1.56            |
| O5     | C2     | 1.225           |
| C2     | N6     | 1.313           |
| C7     | N3     | 1.31            |
| C4     | C8     | 1.484           |
| C9     | N6     | 1.408           |
| O10    | C7     | 1.221           |
| C11    | C7     | 1.52            |
| C12    | C8     | 1.411           |
| C13    | C8     | 1.411           |
| C9     | C14    | 1.532           |
| C11    | N15    | 1.466           |

|     |     |       |
|-----|-----|-------|
| C16 | C12 | 1.402 |
| C17 | C13 | 1.406 |
| O18 | C14 | 1.228 |
| O19 | C14 | 1.228 |
| C16 | C20 | 1.401 |
| C17 | C20 | 1.407 |
| O21 | C20 | 1.366 |

Tables S18. GYG Bond angle data.

| <b>Atom 1</b> | <b>Atom 2</b> | <b>Atom 3</b> | <b>Bond Angle (°)</b> |
|---------------|---------------|---------------|-----------------------|
| C2            | C1            | N3            | 108.883               |
| C4            | C1            | C2            | 111.354               |
| C4            | C1            | N3            | 109.61                |
| O5            | C2            | C1            | 119.917               |
| C1            | C2            | N6            | 118.748               |
| O5            | C2            | N6            | 121.295               |
| C1            | N3            | C7            | 122.676               |
| C8            | C4            | C1            | 112.032               |

|     |     |     |         |
|-----|-----|-----|---------|
| C9  | N6  | C2  | 122.389 |
| O10 | C7  | N3  | 123.258 |
| C11 | C7  | N3  | 115.709 |
| O10 | C7  | C11 | 120.694 |
| C4  | C8  | C12 | 120.226 |
| C4  | C8  | C13 | 120.402 |
| C13 | C8  | C12 | 118.199 |
| C14 | C9  | N6  | 114.977 |
| C7  | C11 | N15 | 111.127 |
| C16 | C12 | C8  | 121.11  |
| C17 | C13 | C8  | 120.715 |
| O18 | C14 | C9  | 119.836 |
| O19 | C14 | C9  | 116.805 |
| O18 | C14 | O19 | 123.074 |
| C12 | C16 | C20 | 119.926 |
| C13 | C17 | C20 | 119.878 |
| C17 | C20 | C16 | 119.364 |
| O21 | C20 | C16 | 118.362 |

|     |     |     |         |
|-----|-----|-----|---------|
| O21 | C20 | C17 | 121.025 |
|-----|-----|-----|---------|

Tables S19. GYG Torsion angle data.

| <b>Atom 1</b> | <b>Atom 2</b> | <b>Atom 3</b> | <b>Atom 4</b> | <b>Torsion Angle<br/>(°)</b> |
|---------------|---------------|---------------|---------------|------------------------------|
| O5            | C2            | C1            | N3            | 45.007                       |
| N3            | C1            | C2            | N6            | -132.712                     |
| O5            | C2            | C1            | C4            | -75.963                      |
| C4            | C1            | C2            | N6            | 106.318                      |
| C2            | C1            | N3            | C7            | 138.508                      |
| C4            | C1            | N3            | C7            | -99.459                      |
| C2            | C1            | C4            | C8            | -65.581                      |
| C8            | C4            | C1            | N3            | 173.875                      |
| C1            | C2            | N6            | C9            | -166.358                     |
| O5            | C2            | N6            | C9            | 15.956                       |
| O10           | C7            | N3            | C1            | -15.957                      |
| C11           | C7            | N3            | C1            | 170.697                      |
| C12           | C8            | C4            | C1            | -106.703                     |

|     |     |     |     |          |
|-----|-----|-----|-----|----------|
| C13 | C8  | C4  | C1  | 85.895   |
| C14 | C9  | N6  | C2  | -89.501  |
| N3  | C7  | C11 | N15 | -156.239 |
| O10 | C7  | C11 | N15 | 30.231   |
| O18 | C14 | C9  | N6  | 168.568  |
| O19 | C14 | C9  | N6  | -17.381  |

Table S20. Hydrogen-bonding Interaction Analysis for GYG.

| Donor  | Acceptor | D-H (Å) | H...A (Å) | D...A (Å) | D-H...A (°) | Type           |
|--------|----------|---------|-----------|-----------|-------------|----------------|
| N3-H9  | O10      | 0.87    | 2.407     | 3.183     | 148.8       | intermolecular |
| N6-H2  | O5       | 0.85    | 2.138     | 2.972     | 168.2       | intermolecular |
| N15-H4 | O18      | 0.89    | 2.670     | 3.342     | 133.4       | intermolecular |
| N15-H4 | O19      | 0.89    | 1.897     | 2.763     | 165.2       | intermolecular |

|         |     |      |       |       |       |                    |
|---------|-----|------|-------|-------|-------|--------------------|
| N15-H5  | O19 | 0.90 | 2.001 | 2.799 | 147.7 | intermole<br>cular |
| N15-H6  | O19 | 0.85 | 2.408 | 3.062 | 134.1 | intermole<br>cular |
| O21-H13 | O18 | 0.99 | 1.731 | 2.719 | 173.7 | intermole<br>cular |
